# Supplementary material for: Plasma Modification of Poly Lactic Acid Solutions to Generate High Quality Electrospun PLA Nanofibers
Source: PubMed Central journal article supplement (PMC5797159; doi:10.1038/s41598-018-20714-5), 2018-02-02
Supplement: 41598_2018_20714_MOESM1_ESM.pdf [file 41598_2018_20714_MOESM1_ESM.pdf]

## **Supporting Information**

### **Plasma Modification of Poly Lactic Acid Solutions to Generate High Quality Electrospun PLA Nanofibers**

Fatemeh Rezaei<sup>1</sup>, Anton Nikiforov<sup>1</sup>, Rino Morent<sup>1</sup>, Nathalie De Geyter<sup>1</sup>

<sup>1</sup> Research Unit Plasma Technology (RUPT), Department of Applied Physics, Faculty of Engineering and Architecture, Ghent University, St-Pietersnieuwstraat 41 B4, 9000 Ghent, Belgium

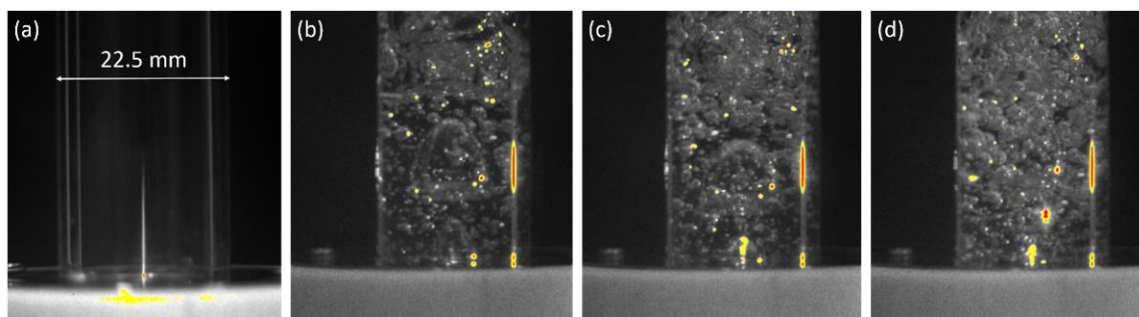

Fig. S1. (a) Pure argon plasma jet (1.8 kV,  $0.5 \text{ lmin}^{-1}$ ). Variation of the number density and size of bubbles at different treatment times; (b) 10 s, (c) 25 s, and (d) 55 s. (For all experiments: 6% w/v,  $0.5 \text{ lmin}^{-1}$ , 1.8 kV)

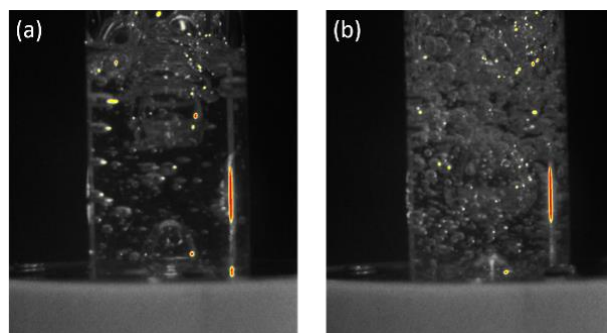

Fig. S2. Variation of the number density and size of bubbles at different flow rates; (a)  $0.3 \text{ lmin}^{-1}$ , and (b)  $0.5 \text{ lmin}^{-1}$ . (For all experiments: 6% w/v, 1.8 kV, 20 s)

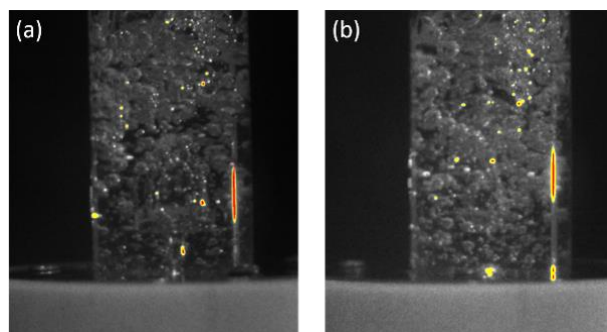

Fig. S3. Variation of the number density and size of bubbles at different applied voltages; (a) 1.8 kV, and (b) 2.1 kV. (For all experiments: 6% w/v,  $0.5 \text{ lmin}^{-1}$ , 20 s)

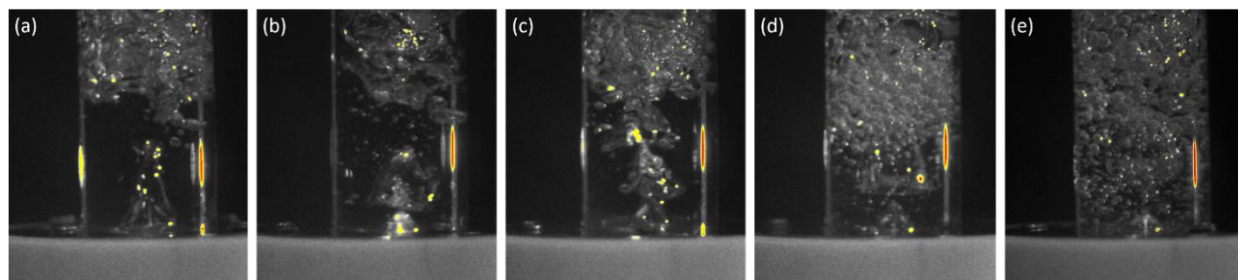

Fig. S4. Variation of the number density and size of bubbles in different solutions. (a) CHL, (b) DMF, (c) CHL/DMF (8:2 v/v), (d) 4% w/v PLA in the solvent mixture, and (e) 6% w/v PLA in the solvent mixture. (For all experiments: 1.8 kV,  $0.5 \text{ lmin}^{-1}$ , 20 s)

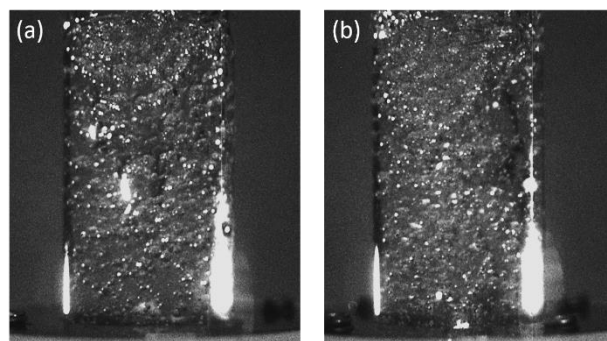

Fig. S5. Difference between the number density of bubbles in (a) Ar-bubbled PLA solution (6% w/v,  $0.5 \text{ lmin}^{-1}$ ) and (b) plasma-treated PLA solution (6% w/v,  $0.5 \text{ lmin}^{-1}$ , 1.8 kV) at the same time scale.

Table S1. Dielectric constant  $\epsilon$  of the solvents.

| Solvent | Chemical formula                | Dielectric constant (F/m) |
|---------|---------------------------------|---------------------------|
| CHL     | $\text{CHCl}_3$                 | 4.81                      |
| DMF     | $\text{C}_3\text{H}_7\text{NO}$ | 36.7                      |
